# Supplementary material
Source: PubMed Central journal article supplement (PMC7431129)
Supplement: mmc1.pdf [file mmc1.pdf]

# THE LANCET

## Infectious Diseases

### Supplementary appendix 1

This translation in French was submitted by the authors and we reproduce it as supplied. It has not been peer reviewed. *The Lancet's* editorial processes have only been applied to the original in English, which should serve as reference for this manuscript.

Supplement to: Jiang L, Tang K, Levin M, et al. COVID-19 and multisystem inflammatory syndrome in children and adolescents. *Lancet Infect Dis* 2020; published online August 17. [https://doi.org/10.1016/S1473-3099\(20\)30651-4](https://doi.org/10.1016/S1473-3099(20)30651-4).

Cette traduction en français a été proposée par les auteurs et nous l'avons reproduite telle quelle. Elle n'a pas été examinée par des pairs. Les processus éditoriaux du *Lancet* n'ont été appliqués qu'à l'original en anglais et c'est cette version qui doit servir de référence pour ce manuscrit.

## Syndrome inflammatoire multisystémique chez les enfants et les adolescents atteints de COVID-19

Alors que le coronavirus 2 du syndrome respiratoire aigu sévère continue de se répandre autour du monde, des descriptions d'un syndrome inflammatoire multisystémique chez les enfants et les adolescents atteints de COVID-19 émanent d'Europe, d'Amérique du nord, d'Asie et d'Amérique latine. Par contre, la relation entre la COVID-19 et ce syndrome inflammatoire multisystémique demeure inadéquatement expliquée. Nous avons réalisé une revue de l'épidémiologie, des causes, des manifestations cliniques et de la prise en charge du syndrome inflammatoire multisystémique chez les enfants et les adolescents atteints de la COVID-19. Nous soulevons aussi les mécanismes physiopathologiques possiblement impliqués dans les processus inflammatoires liés à la COVID-19 et pouvant causer la défaillance d'organes chez les enfants et adolescents sévèrement atteints. Cette perspective révèle l'importance de développer une définition claire ainsi qu'un protocole de traitement pour cette nouvelle entité, en plus de souligner des interventions thérapeutiques crédibles et la possibilité du développement d'un vaccin efficace.
