# Supplementary material
Source: PubMed Central journal article supplement (PMC7431129)
Supplement: mmc2.pdf [file mmc2.pdf]

# THE LANCET

## Infectious Diseases

### Supplementary appendix 2

This translation in Chinese was submitted by the authors and we reproduce it as supplied. It has not been peer reviewed. *The Lancet's* editorial processes have only been applied to the original in English, which should serve as reference for this manuscript.

Supplement to: Jiang L, Tang K, Levin M, et al. COVID-19 and multisystem inflammatory syndrome in children and adolescents. *Lancet Infect Dis* 2020; published online August 17. [https://doi.org/10.1016/S1473-3099\(20\)30651-4](https://doi.org/10.1016/S1473-3099(20)30651-4).

此简体中文译文由作者提交，我方按照提供的版本刊登。此译文并未经过同行审阅。医学期刊《柳叶刀》的编辑流程仅适用于英文原稿，英文原稿应作为此手稿的参考。

## 新型冠状病毒肺炎与儿童和青少年多系统炎症综合征

随着新型冠状病毒肺炎在全球的蔓延，欧洲、北美洲、亚洲及拉丁美洲越来越多的报告了与新型冠状病毒肺炎相关的儿童及青少年多系统炎症综合征。然而，两种疾病之间的病因学关系依然未知。我们回顾了既已发表的与新型冠状病毒相关的儿童多系统炎症综合征的研究文献，对其流行病学、病因学、临床特征、以及现有的诊疗指南进行梳理。我们同时讨论了由新型冠状病毒肺炎所致炎性反应、进而导致重症儿童患者中器官损伤的可能的病理生理学机制。这些证据可以帮助我们更好地界定此类疾病并制定相应的诊疗指南。同时，本研究也为药物干预以及潜在的疫苗开发路径提供新的思路。
