# Supplementary material
Source: PubMed Central journal article supplement (PMC7431129)
Supplement: mmc3.pdf [file mmc3.pdf]

# THE LANCET

## Infectious Diseases

### Supplementary appendix 3

This translation in Arabic was submitted by the authors and we reproduce it as supplied. It has not been peer reviewed. *The Lancet's* editorial processes have only been applied to the original in English, which should serve as reference for this manuscript.

Supplement to: Jiang L, Tang K, Levin M, et al. COVID-19 and multisystem inflammatory syndrome in children and adolescents. *Lancet Infect Dis* 2020; published online August 17. [https://doi.org/10.1016/S1473-3099\(20\)30651-4](https://doi.org/10.1016/S1473-3099(20)30651-4).

تم تقديم هذه الترجمة باللغة العربية من قبل المؤلفين ونعيد إنتاجها كما هو مُقدم. إنها لم تخضع لاستعراض الأقران. تم تطبيق عمليات تحرير لانسيت فقط على النص الأصلي باللغة الإنجليزية، والذي يجب أن يكون بمثابة مرجع لهذه المخطوطة.

## كوفيد-١٩ و متلازمة الالتهابات المتعددة لدى الأطفال واليافعين

مع استمرار انتشار فيروس كورونا المرتبط بالمتلازمة التنفسية الحادة الوخيمة النوع ٢ في أنحاء العالم هناك تقارير متزايدة من أوروبا، أمريكا الشمالية، آسيا وأمريكا الجنوبية توضح ترافق حالات كوفيد-١٩ لدى الأطفال واليافعين بالإصابة بمتلازمة الالتهابات المتعددة. على أي حال فإن هذا الترافق بين كوفيد-١٩ و متلازمة الالتهابات المتعددة لا يزال مجهول الهوية. إننا نقوم باستعراض الصفات الوبائية، الأسباب، الملامح السريرية، وبرتوكولات العلاج الحالية الخاصة بمتلازمة الالتهابات المتعددة لدى الأطفال واليافعين والمترافقة مع كوفيد-١٩. كما أننا نقوم بمناقشة الآليات الفيزيولوجية المرضية الأساسية لكوفيد-١٩ التي من المحتمل أن تحرض العمليات الالتهابية، والتي بدورها قد تؤدي إلى تلف الأعضاء لدى الأطفال واليافعين الذين يعانون من حالات مرضية شديدة. هذه الانطباعات تعطي دليلاً يفيد بالحاجة إلى تطوير تعريف واضح وبروتوكول علاجي لهذه الحالة المستجدة، وكذلك يسلط الضوء على التداخلات العلاجية المستقبلية وإمكانيات تطوير اللقاح.
