# Supplementary material
Source: PubMed Central journal article supplement (PMC7431129)
Supplement: mmc4.pdf [file mmc4.pdf]

# THE LANCET

## Infectious Diseases

### Supplementary appendix 4

This translation in Spanish was submitted by the authors and we reproduce it as supplied. It has not been peer reviewed. *The Lancet's* editorial processes have only been applied to the original in English, which should serve as reference for this manuscript.

Supplement to: Jiang L, Tang K, Levin M, et al. COVID-19 and multisystem inflammatory syndrome in children and adolescents. *Lancet Infect Dis* 2020; published online August 17. [https://doi.org/10.1016/S1473-3099\(20\)30651-4](https://doi.org/10.1016/S1473-3099(20)30651-4).

Los autores nos proporcionaron esta traducción al español y la reproducimos tal como nos fue entregada. No la hemos revisado. Los procesos editoriales de *The Lancet* se han aplicado únicamente al original en inglés, que debe servir de referencia para este manuscrito.

## COVID-19 y el síndrome inflamatorio multiorgánico en niños y adolescentes

A medida que el coronavirus tipo 2 del síndrome respiratoria agudo severo continúa propagándose en todo el mundo, ha habido aumento de informes de Europa, Norteamérica, Asia y Latinoamérica que describen niños y adolescentes con casos de afecciones inflamatorias multiorgánicas asociadas a Covid-19. Sin embargo, la asociación entre el síndrome inflamatorio multiorgánico en niños y COVID-19 aún está desconocido. Revisamos la epidemiología, las causas, las características clínicas, y los protocolos de tratamiento actuales para el síndrome inflamatorio multiorgánico en niños y adolescentes asociados a COVID-19. Analizamos los posibles mecanismos fisiopatológicos subyacentes de los procesos inflamatorios inducidos por COVID-19, que pueden causar lesión de órganos en pacientes pediátricos que están gravemente enfermos. Estas percepciones demuestran la necesidad de una definición clara y un protocolo de tratamiento para esta nueva enfermedad, y también esclarecen las futuras intervenciones terapéuticas y la posibilidad de desarrollo de vacunas.
