# Supplementary material
Source: PubMed Central journal article supplement (PMC7431129)
Supplement: mmc5.pdf [file mmc5.pdf]

# THE LANCET

## Infectious Diseases

### Supplementary appendix 5

This translation in Russian was submitted by the authors and we reproduce it as supplied. It has not been peer reviewed. *The Lancet's* editorial processes have only been applied to the original in English, which should serve as reference for this manuscript.

Supplement to: Jiang L, Tang K, Levin M, et al. COVID-19 and multisystem inflammatory syndrome in children and adolescents. *Lancet Infect Dis* 2020; published online August 17. [https://doi.org/10.1016/S1473-3099\(20\)30651-4](https://doi.org/10.1016/S1473-3099(20)30651-4).

Этот перевод на русский язык был предоставлен авторами, и мы воспроизводим его в том виде, в котором он был предоставлен. Этот перевод не был рецензирован. Редакционные процессы журнала *The Lancet* были применены только к оригиналу на английском языке, который служит отсылкой для этой статьи.

## COVID-19 и мультисистемный воспалительный синдром у детей и подростков

С распространением тяжелого острого респираторного синдрома коронавируса 2 по всему миру растет и количество сообщений из Европы, Северной Америки, Азии и Латинской Америки, описывающих наличие у детей и мультисистемного воспалительного синдрома ассоциированного с COVID-19. Однако, природа связи мультисистемного воспаления и COVID-19 пока не изучена. В наш обзор включены эпидемиологические аспекты, причины, клинические особенности и текущие протоколы лечения мультисистемного воспалительного синдрома ассоциированного с COVID-19. Также, рассмотрены возможные основные патофизиологические механизмы воспалительных процессов, вызванных COVID-19, которые могут приводить к повреждению органов пациентов детского возраста с тяжелыми формами заболеваний. Приведенные данные демонстрируют необходимость разработки точного определения и протокола лечения описываемого синдрома и обозначают будущие терапевтические вмешательства и возможности разработки вакцины.
