# Supplementary material
Source: PubMed Central journal article supplement (PMC7431129)
Supplement: mmc6.pdf [file mmc6.pdf]

# THE LANCET

## Infectious Diseases

### Supplementary appendix 6

This appendix formed part of the original submission and has been peer reviewed.  
We post it as supplied by the authors.

Supplement to: Jiang L, Tang K, Levin M, et al. COVID-19 and multisystem inflammatory syndrome in children and adolescents. *Lancet Infect Dis* 2020; published online August 17. [https://doi.org/10.1016/S1473-3099\(20\)30651-4](https://doi.org/10.1016/S1473-3099(20)30651-4).

## Supplementary materials

**Table S1. Main characteristics of included studies**

| Author                               | Country             | Study design                    | Study Population           |                                   |           | Clinical outcome |        |
|--------------------------------------|---------------------|---------------------------------|----------------------------|-----------------------------------|-----------|------------------|--------|
|                                      |                     |                                 | Total study population (N) | Mean age or age range             | Sex (M:F) | Recovered        | Deaths |
| Jones et al. <sup>1</sup>            | US                  | Case report                     | 1                          | 6 months                          | F         | 1                | -      |
| Balasubramanian et al. <sup>2</sup>  | India               | Case report                     | 1                          | 8 years                           | M         | 1                | -      |
| Rauf et al. <sup>3</sup>             | India               | Case report                     | 1                          | 5 years                           | M         | 1                | -      |
| Greene et al. <sup>4</sup>           | US                  | Case report                     | 1                          | 11 years                          | F         | 1                | -      |
| Rivera-Figueroa, et al. <sup>5</sup> | US                  | Case report                     | 1                          | 5 years                           | M         | 1                | -      |
| Riphagen et al. <sup>6</sup>         | UK                  | Case report                     | 8                          | Mean=8 (4-14) years               | 5:3       | 7                | 1      |
| Verdoni et. al. <sup>7</sup>         | Italy               | Case series                     | 10                         | Mean=7.5 (5-16) years             | 7:3       | 10               | -      |
| Toubiana et al. <sup>8</sup>         | France              | Prospective observational study | 21                         | Median=7.9 (3.7-16.6) years       | 9:12      | 21               | -      |
| Chiotos et al. <sup>9</sup>          | US                  | Case series                     | 6                          | Mean=7 (5-14) years               | 1:5       | 6                | -      |
| Grimaud et al. <sup>10</sup>         | France              | Case series                     | 20                         | Median=10 (2.9-15) years          | 10:10     | 20               | -      |
| Whittaker et al. <sup>11</sup>       | UK                  | Case series                     | 58                         | Median=9 (0.25 to 17) years       | 25:33     | 57               | 1      |
| Cheung et al. <sup>12</sup>          | US                  | Case series                     | 17                         | Mean=8 (1.8-16) years             | 8:9       | 17               | -      |
| Belhadjer et al. <sup>13</sup>       | France, Switzerland | Case series                     | 35                         | Median=10 years                   | 18:17     | 28               | -      |
| Dufort et al. <sup>14</sup>          | US                  | Case series                     | 99                         | NA                                | 53:46     | 97               | 2      |
| Feldstein et al. <sup>15</sup>       | US                  | Case series                     | 186                        | Median=8.3 years                  | 115:71    | 130              | 4      |
| Hameed et al. <sup>16</sup>          | UK                  | Case series                     | 35                         | Median=11 years                   | 27:8      | -                | -      |
| Kaushik et al. <sup>17</sup>         | US                  | Case series                     | 33                         | Median=10 (1 month to 21) years   | 20:13     | 32               | 1      |
| Capone et al. <sup>18</sup>          | US                  | Case series                     | 33                         | Median=8.6 (2.2-17.0) years       | 20:13     | 33               | -      |
| Miller et al. <sup>19</sup>          | US                  | Case series                     | 44                         | Median=7.3 (7 months to 20) years | 20:24     | 44               | -      |
| Riollano-Cruz et al. <sup>20</sup>   | US                  | Case series                     | 15                         | Mean=12 (3-20) years              | 11:4      | 14               | 1      |

|                                |        |             |    |                               |      |    |   |
|--------------------------------|--------|-------------|----|-------------------------------|------|----|---|
| Blondiaux et al. <sup>21</sup> | France | Case series | 4  | Mean=9 (6-12) years           | 1:3  | 4  | - |
| Ng et al. <sup>22</sup>        | UK     | Case series | 3  | Mean=15.3 years               | 2:1  | 3  | - |
| Licciardi et al. <sup>23</sup> | Italy  | Case series | 2  | 9.5 years                     | 2:0  | 2  | - |
| Ouldali et al. <sup>24</sup>   | France | Case series | 10 | Mean=10.2 (1.5 to 15.8) years | 4:6  | 10 | - |
| Ramcharan et al. <sup>25</sup> | UK     | Case series | 15 | Median=8.8 (6.4-11.2) years   | 11:4 | 15 | - |
| Schupper et al. <sup>26</sup>  | US     | Case series | 2  | NA                            | 2:0  | -  | 1 |
| Pouletty, et al. <sup>27</sup> | France | Case series | 16 | Median=10 years               | 8:8  | 16 | - |
| Waltuch, et al. <sup>28</sup>  | US     | Case series | 4  | Mean=10 years                 | 3:1  | -  | - |

---

**Table S2. Pooled meta-analysis of demographic and clinical characteristics of MIS-C/PIMS-TS patients†**

| Characteristics                                    | Events | Total No. | Pooled mean proportion % (95%CI) | Heterogeneity I <sup>2</sup> (%) |
|----------------------------------------------------|--------|-----------|----------------------------------|----------------------------------|
| <b>Demographics</b>                                |        |           |                                  |                                  |
| Female sex                                         | 287    | 660       | 44.2 (38.8-49.7)                 | 30.7                             |
| <b>Ethnicity</b>                                   |        |           |                                  |                                  |
| African black                                      | 173    | 542       | 35.6 (28.5-43.4)                 | 56.5                             |
| Hispanic                                           | 101    | 375       | 27.5 (16.8-41.6)                 | 69.5                             |
| Non-Hispanic white                                 | 103    | 539       | 19.5 (15.1-24.7)                 | 29.4                             |
| Asian                                              | 39     | 349       | 10.5 (4.9-21.0)                  | 72.0                             |
| Other                                              | 109    | 491       | 22.4 (15.7-31.0)                 | 63.2                             |
| <b>Exposure or contact history</b>                 | 118    | 660       | 37.2 (27.6-48.0)                 | 55.5                             |
| <b>Clinical features</b>                           |        |           |                                  |                                  |
| Fever (lasting ≥4 days)                            | 609    | 650       | 94.6 (89.9-97.2)                 | 48.9                             |
| Conjunctivitis                                     | 291    | 565       | 50.1 (42.0-58.1)                 | 57.0                             |
| Erythema and cracking of lips, tongue, oral mucosa | 164    | 375       | 45.9 (36.4-55.8)                 | 49.9                             |
| Cervical lymphadenopathy                           | 81     | 465       | 25.4 (12.8-44.0)                 | 85.8                             |
| Erythema and edema of hands and feet               | 116    | 404       | 32.4 (19.5-48.7)                 | 78.9                             |
| Rash                                               | 347    | 600       | 57.2 (51.2-63.0)                 | 35.3                             |
| Abdominal pain                                     | 127    | 660       | 68.9 (56.8-78.8)                 | 43.2                             |
| Diarrhea                                           | 48     | 99        | 50.3 (37.0-63.6)                 | 24.2                             |
| Vomiting                                           | 62     | 91        | 69.2 (58.8-78.2)                 | 0                                |
| Other GI symptoms (not specified)                  | 410    | 465       | 86.9 (81.8-90.8)                 | 25.7                             |
| Respiratory symptoms                               | 256    | 473       | 49.1 (37.7-60.5)                 | 75.8                             |
| Neurologic symptoms                                | 133    | 370       | 38.7 (29.0-49.4)                 | 65.8                             |
| Complete KD                                        | 105    | 312       | 41.1 (27.9-55.8)                 | 70.6                             |
| Incomplete KD                                      | 34     | 76        | 45.6 (34.4-57.2)                 | 0                                |
| Myocarditis                                        | 124    | 243       | 57.8 (43.3-71.1)                 | 61.3                             |
| Shock                                              | 238    | 438       | 66.5 (52.0-78.5)                 | 81.4                             |
| Comorbidity                                        | 110    | 546       | 19.2 (13.2-27.1)                 | 57.6                             |
| <b>Laboratory and radiological features</b>        |        |           |                                  |                                  |
| RT-PCR                                             | 275    | 655       | 34.7 (26.3-44.1)                 | 67.6                             |
| <b>Serological test</b>                            |        |           |                                  |                                  |
| Elevation in troponin                              | 399    | 519       | 80.9 (70.2-88.4)                 | 69.8                             |
| Elevation in BNP                                   | 373    | 438       | 84.9 (77.3-90.3)                 | 49.5                             |
| Elevated D-dimer                                   | 330    | 356       | 93.3 (84.5-97.3)                 | 69.5                             |
| Hyponatremia                                       | 64     | 77        | 80.8 (64.7-90.6)                 | 24.7                             |
| Hypoalbuminemia                                    | 75     | 118       | 70.2 (40.2-89.1)                 | 82.1                             |
| <b>Abnormal renal function tests</b>               |        |           |                                  |                                  |
| Coronary artery dilation                           | 27     | 193       | 15.5 (10.9-21.6)                 | 0                                |
| Coronary aneurysm                                  | 33     | 442       | 8.9 (6.2-12.6)                   | 7.3                              |

|                        |     |     |                  |      |
|------------------------|-----|-----|------------------|------|
| Cardiac dysfunction    | 218 | 327 | 63.3 (52.9-72.6) | 47.6 |
| <b>Treatment</b>       |     |     |                  |      |
| ICU admission          | 481 | 606 | 79.1 (70.8-85.5) | 61.7 |
| Mechanical ventilation | 187 | 648 | 29.2 (19.9-40.5) | 79.3 |
| ECMO                   | 32  | 525 | 7.6 (4.1-13.8)   | 57.1 |
| <b>Outcomes</b>        |     |     |                  |      |
| Recovered              | 530 | 619 | 91.1 (82.3-95.7) | 76.8 |
| Death                  | 11  | 625 | 3.5 (2.2-5.5)    | 0    |

† Three case series were not included in the meta-analysis due to overlapping in cases: (1) cases reported in two studies (Rivera-Figueroa EL, et al, Indian Pediatrics 2020; Waltuch T, et al, American Journal of Emergency Medicine 2020) were also included in the case series reported by Feldstein et al. (New England Journal of Medicine 2020); (2) cases reported by Riphagen S, et al. (The Lancet 2020) were also included in the study from Whittaker, et al. (JAMA 2020); Random-effect model is employed.

Figure S1: PRISMA flow diagram of study selection process

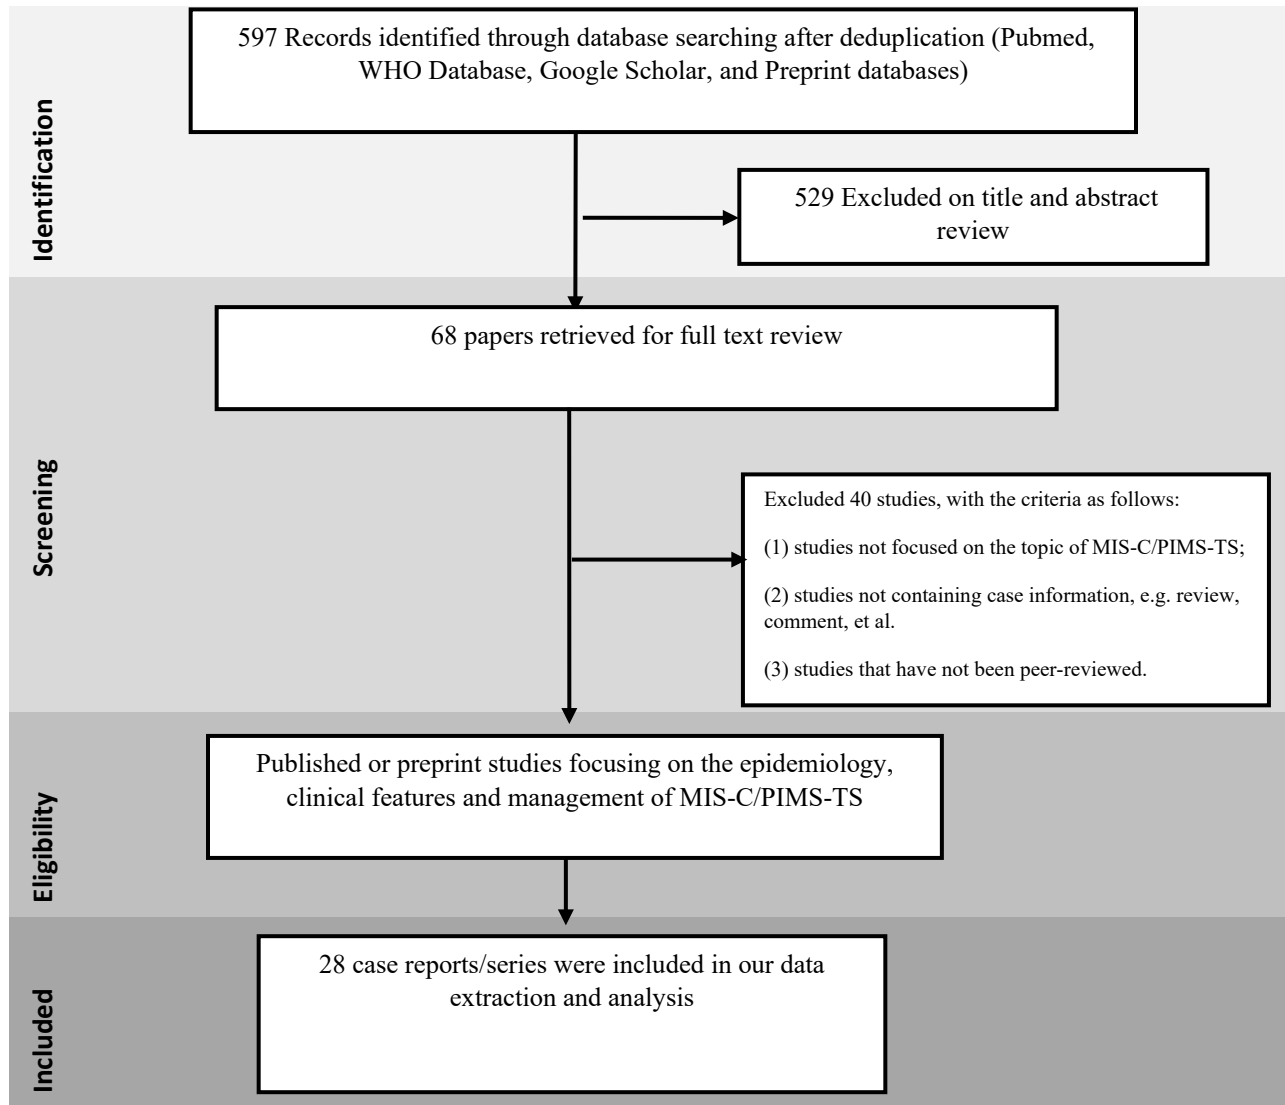

## References

1. Jones VG, Mills M, Suarez D, et al. COVID-19 and Kawasaki disease: novel virus and novel case. *Hospital Pediatrics* 2020; **10**(6): 537-40.
2. Balasubramanian S, Nagendran T, Ramachandran B, Ramanan A. Hyper-inflammatory Syndrome in a Child With COVID-19 Treated Successfully With Intravenous Immunoglobulin and Tocilizumab. *Indian pediatrics* 2020. 2020;S097475591600180.
3. Rauf A, Vijayan A, John ST, Krishnan R, Latheef A. Multisystem inflammatory syndrome with features of atypical Kawasaki disease during COVID-19 pandemic. *The Indian Journal of Pediatrics* 2020. doi:10.1007/s12098-020-03357-1.
4. Greene AG, Saleh M, Roseman E, Sinert R. Toxic shock-like syndrome and COVID-19: A case report of multisystem inflammatory syndrome in children (MIS-C). *The American Journal of Emergency Medicine* 2020. S0735-6757(20)30492-7.
5. Rivera-Figueroa E, Santos R, Simpson S, Garg P. Incomplete Kawasaki Disease in a Child with Covid-19. *Indian pediatrics* 2020. S097475591600179.
6. Riphagen S, Gomez X, Gonzalez-Martinez C, Wilkinson N, Theocharis P. Hyperinflammatory shock in children during COVID-19 pandemic. *The Lancet* 2020; **395**(10237): 1607-8.
7. Verdoni L, Mazza A, Gervasoni A, et al. An outbreak of severe Kawasaki-like disease at the Italian epicentre of the SARS-CoV-2 epidemic: an observational cohort study. *The Lancet* 2020. **395**(10239): 1771-78.
8. Toubiana J, Poirault C, Corsia A, et al. Kawasaki-like multisystem inflammatory syndrome in children during the covid-19 pandemic in Paris, France: prospective observational study. *bmj* 2020; **369**: m2094.
9. Chiotos K, Bassiri H, Behrens EM, et al. Multisystem Inflammatory Syndrome in Children during the COVID-19 pandemic: a case series. *Journal of the Pediatric Infectious Diseases Society* 2020. **9**(3): 393-98.
10. Grimaud M, Starck J, Levy M, et al. Acute myocarditis and multisystem inflammatory emerging disease following SARS-CoV-2 infection in critically ill children. *Annals of Intensive Care* 2020; **10**(1): 1-5.
11. Whittaker E, Bamford A, Kenny J, et al. Clinical Characteristics of 58 Children With a Pediatric Inflammatory Multisystem Syndrome Temporally Associated With SARS-CoV-2. *JAMA* 2020. doi:10.1001/jama.2020.10369
12. Cheung EW, Zachariah P, Gorelik M, et al. Multisystem Inflammatory Syndrome Related to COVID-19 in Previously Healthy Children and Adolescents in New York City. *JAMA* 2020. doi:10.1001/jama.2020.10374
13. Belhadjer Z, Méot M, Bajolle F, et al. Acute heart failure in multisystem inflammatory syndrome in children (MIS-C) in the context of global SARS-CoV-2 pandemic. *Circulation*; **0**(0).
14. Dufort EM, Koumans EH, Chow EJ, et al. Multisystem Inflammatory Syndrome in Children in New York State. *New England Journal of Medicine* 2020. doi: 10.1056/NEJMoa2021756
15. Feldstein LR, Rose EB, Horwitz SM, et al. Multisystem Inflammatory Syndrome in U.S. Children and Adolescents. *New England Journal of Medicine* 2020. doi: 10.1056/NEJMoa2021680.
16. Hameed S, Elbaaly H, Reid CEL, et al. Spectrum of Imaging Findings on Chest Radiographs, US, CT, and MRI Images in Multisystem Inflammatory Syndrome in Children (MIS-C) Associated with COVID-19. *Radiology*; doi: 10.1148/radiol.2020202543.
17. Kaushik S, Aydin SI, Derespina KR, et al. Multisystem Inflammatory Syndrome in Children Associated with Severe Acute Respiratory Syndrome Coronavirus 2 Infection: A Multi-institutional Study from New York City. *The Journal of Pediatrics* 2020. doi: 10.1016/j.jpeds.2020.06.045
18. Capone CA, Subramony A, Sweberg T, et al. Characteristics, Cardiac involvement, and Outcomes of Multisystem Inflammatory Disease of Childhood (MIS-C) Associated with SARS-CoV-2 Infection. *The Journal of pediatrics* 2020: S0022-3476(20)30746-0.
19. Miller J, Cantor A, Zachariah P, Ahn D, Martinez M, Margolis K. Gastrointestinal symptoms as a major presentation component of a novel multisystem inflammatory syndrome in children (MIS-C) that is related to COVID-19: a single center experience of 44 cases. *Gastroenterology* 2020: S0016-5085(20)34753-3.
20. Riollano-Cruz M, Akkoyun E, Briceno-Brito E, et al. Multisystem Inflammatory Syndrome in Children (MIS-C) Related to COVID-19: A New York City Experience. *Journal of Medical Virology*; doi: 10.1002/jmv.26224
21. Blondiaux E, Parisot P, Redheuil A, et al. Cardiac MRI of Children with Multisystem Inflammatory Syndrome (MIS-C) Associated with COVID-19: Case Series. *Radiology* 2020. doi: 10.1148/radiol.2020202288
22. Ng KF, Kothari T, Bandi S, et al. COVID-19 multisystem inflammatory syndrome in three teenagers with confirmed SARS-CoV-2 infection. *Journal of Medical Virology* 2020. doi: 10.1002/jmv.26206.

23. Licciardi F, Pruccoli G, Denina M, et al. SARS-CoV-2-Induced Kawasaki-Like Hyperinflammatory Syndrome: A Novel COVID Phenotype in Children. *Pediatrics* 2020: e20201711.
24. Ouldali N, Pouletty M, Mariani P, et al. Emergence of Kawasaki disease related to SARS-CoV-2 infection in an epicentre of the French COVID-19 epidemic: a time-series analysis. *The Lancet Child & Adolescent Health* 2020. doi: 10.1016/S2352-4642(20)30175-9.
25. Ramcharan T, Nolan O, Lai CY, et al. Paediatric Inflammatory Multisystem Syndrome: Temporally Associated with SARS-CoV-2 (PIMS-TS): Cardiac Features, Management and Short-Term Outcomes at a UK Tertiary Paediatric Hospital. *Pediatric Cardiology* 2020. doi:10.1007/s00246-020-02391-2.
26. Schupper AJ, Yaeger KA, Morgenstern PF. Neurological manifestations of pediatric multi-system inflammatory syndrome potentially associated with COVID-19. *Child's Nervous System* 2020; **36**(8): 1579-80.
27. Pouletty M, Borocco C, Ouldali N, et al. Paediatric multisystem inflammatory syndrome temporally associated with SARS-CoV-2 mimicking Kawasaki disease (Kawa-COVID-19): a multicentre cohort. *Annals of the Rheumatic Diseases* 2020; **79**(8): 999-1006.
28. Waltuch T, Gill P, Zinns LE, et al. Features of COVID-19 post-infectious cytokine release syndrome in children presenting to the emergency department. *The American Journal of Emergency Medicine* 2020. doi: 10.1016/j.ajem.2020.05.058.
